# Supplementary material for: Genome-wide identification and expression analysis of 3-ketoacyl-CoA synthase gene family in rice (Oryza sativa L.) under cadmium stress
Source: Front Plant Sci. 2023 Jul 24;14:1222288. doi: 10.3389/fpls.2023.1222288 (PMC10406525; doi:10.3389/fpls.2023.1222288)
Supplement: Supplementary Table 1 — Enrichment analysis of OsKCS genes. [file Table_1.xlsx]

## Sheet: GO_enrichment
GO.ID	Term	Annotated	Count	Expected	p-value	q-value	Aspect
GO:0006633	fatty acid biosynthetic process	153	22	0.17	1e-30	5.16e-28	BP
GO:0072330	monocarboxylic acid biosynthetic process	212	22	0.23	1e-30	5.16e-28	BP
GO:0006631	fatty acid metabolic process	215	22	0.24	1e-30	5.16e-28	BP
GO:0008610	lipid biosynthetic process	406	22	0.45	1e-30	5.16e-28	BP
GO:0016053	organic acid biosynthetic process	439	22	0.49	1e-30	5.16e-28	BP
GO:0046394	carboxylic acid biosynthetic process	439	22	0.49	1e-30	5.16e-28	BP
GO:0044255	cellular lipid metabolic process	547	22	0.6	1e-30	5.16e-28	BP
GO:0032787	monocarboxylic acid metabolic process	559	22	0.62	1e-30	5.16e-28	BP
GO:0044283	small molecule biosynthetic process	590	22	0.65	1e-30	5.16e-28	BP
GO:0006629	lipid metabolic process	767	22	0.85	1e-30	5.16e-28	BP
GO:0019752	carboxylic acid metabolic process	1079	22	1.19	1.2e-28	5.63e-26	BP
GO:0043436	oxoacid metabolic process	1109	22	1.23	2.1e-28	8.73e-26	BP
GO:0006082	organic acid metabolic process	1111	22	1.23	2.2e-28	8.73e-26	BP
GO:0044711	single-organism biosynthetic process	1534	22	1.7	2.8e-25	1.03e-22	BP
GO:0044281	small molecule metabolic process	1650	22	1.82	1.4e-24	4.81e-22	BP
GO:0044249	cellular biosynthetic process	4174	22	4.62	1.1e-15	3.55e-13	BP
GO:1901576	organic substance biosynthetic process	4391	22	4.86	3.5e-15	1.06e-12	BP
GO:0009058	biosynthetic process	4728	22	5.23	1.8e-14	5.16e-12	BP
GO:0044710	single-organism metabolic process	4762	22	5.27	2.1e-14	5.7e-12	BP
GO:0044763	single-organism cellular process	6505	22	7.19	2e-11	5.16e-09	BP
GO:0000038	very long-chain fatty acid metabolic process	12	4	0.01	5.5e-10	1.35e-07	BP
GO:0042335	cuticle development	14	4	0.02	1.1e-09	2.58e-07	BP
GO:0044699	single-organism process	8670	22	9.59	1.1e-08	2.47e-06	BP
GO:0009409	response to cold	225	4	0.25	9.9e-05	0.0206	BP
GO:0044237	cellular metabolic process	13106	22	14.49	0.0001	0.0206	BP
GO:0010025	wax biosynthetic process	14	2	0.02	0.00011	0.0218	BP
GO:0010166	wax metabolic process	15	2	0.02	0.00012	0.0229	BP
GO:0044238	primary metabolic process	13666	22	15.11	0.00026	0.0479	BP
GO:0009266	response to temperature stimulus	349	4	0.39	0.00053	0.0942	BP
GO:0071704	organic substance metabolic process	14254	22	15.76	0.00065	0.112	BP
GO:0009416	response to light stimulus	419	4	0.46	0.00105	0.175	BP
GO:0009314	response to radiation	445	4	0.49	0.00131	0.211	BP
GO:0009987	cellular process	15706	22	17.37	0.00548	0.831	BP
GO:0016020	membrane	8287	22	11.67	8.7e-07	0.00077	CC
GO:0005783	endoplasmic reticulum	608	4	0.86	0.0095	1	CC
GO:0016746	transferring acyl groups	514	22	0.44	1e-30	1.27e-27	MF
GO:0016740	transferase activity	4567	22	3.9	2.9e-17	2.46e-14	MF
GO:0003824	catalytic activity	12488	22	10.68	1.2e-07	7.64e-05	MF

## Sheet: KEGG_enrichment
#Term	Database	ID	Input number	Background number	P-Value	Corrected P-Value	Input
Fatty acid elongation	KEGG PATHWAY	osa00062	22	40	5.42012e-62	1.62604e-61	Os03t0162650-01|Os03t0220100-01|Os10t0472900-01|Os09t0521100-01|Os11t0591200-01|Os05t0568000-02|Os02t0731900-01|Os06t0598800-01|Os03t0245700-02|Os09t0360500-01|Os03t0181500-01|Os06t0260500-00|Os06t0262800-01|Os03t0382100-01|Os03t0162800-01|Os02t0813600-01|Os02t0205500-01|Os04t0116800-01|Os10t0416200-01|Os05t0574600-01|Os03t0383600-01|Os01t0529800-01
Biosynthesis of secondary metabolites	KEGG PATHWAY	osa01110	22	1177	6.27486e-32	9.41229e-32	Os03t0162650-01|Os03t0220100-01|Os10t0472900-01|Os09t0521100-01|Os11t0591200-01|Os05t0568000-02|Os02t0731900-01|Os06t0598800-01|Os03t0245700-02|Os09t0360500-01|Os03t0181500-01|Os06t0260500-00|Os06t0262800-01|Os03t0382100-01|Os03t0162800-01|Os02t0813600-01|Os02t0205500-01|Os04t0116800-01|Os10t0416200-01|Os05t0574600-01|Os03t0383600-01|Os01t0529800-01
Metabolic pathways	KEGG PATHWAY	osa01100	22	2290	1.29409e-25	1.29409e-25	Os03t0162650-01|Os03t0220100-01|Os10t0472900-01|Os09t0521100-01|Os11t0591200-01|Os05t0568000-02|Os02t0731900-01|Os06t0598800-01|Os03t0245700-02|Os09t0360500-01|Os03t0181500-01|Os06t0260500-00|Os06t0262800-01|Os03t0382100-01|Os03t0162800-01|Os02t0813600-01|Os02t0205500-01|Os04t0116800-01|Os10t0416200-01|Os05t0574600-01|Os03t0383600-01|Os01t0529800-01
